# Supplementary figures and images for: A fluorescent acrylamide-type monomer bearing an environment-sensitive methoxybenzocoumarin structure for the development of functional polymeric sensors
Source: Royal Society of Chemistry journal article supplement (doi:10.1039/c6pp00150e), 2016-08-12

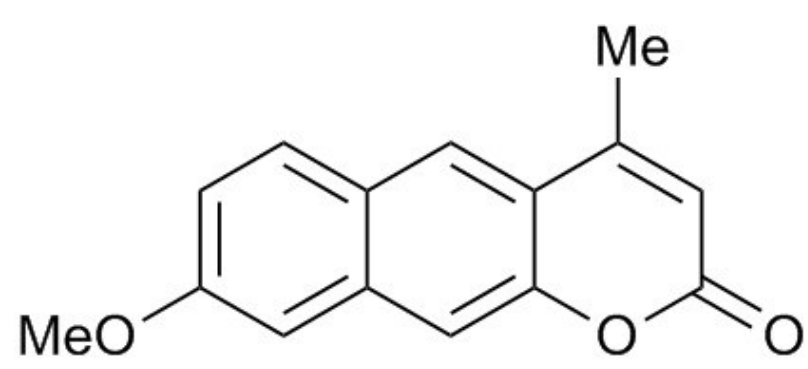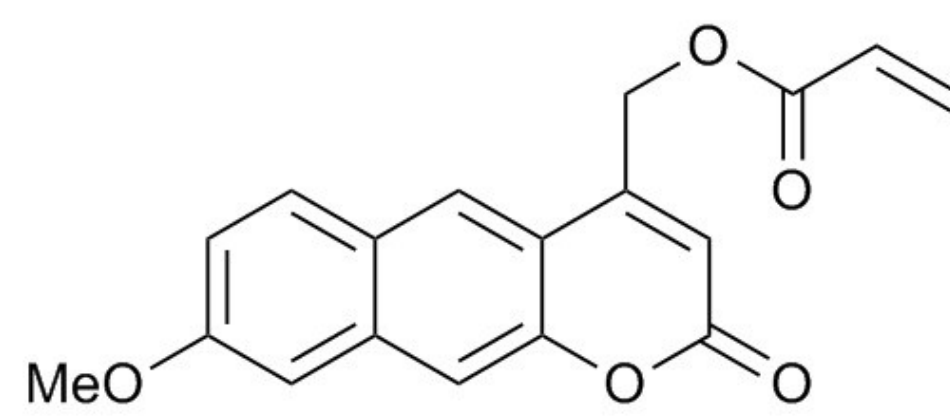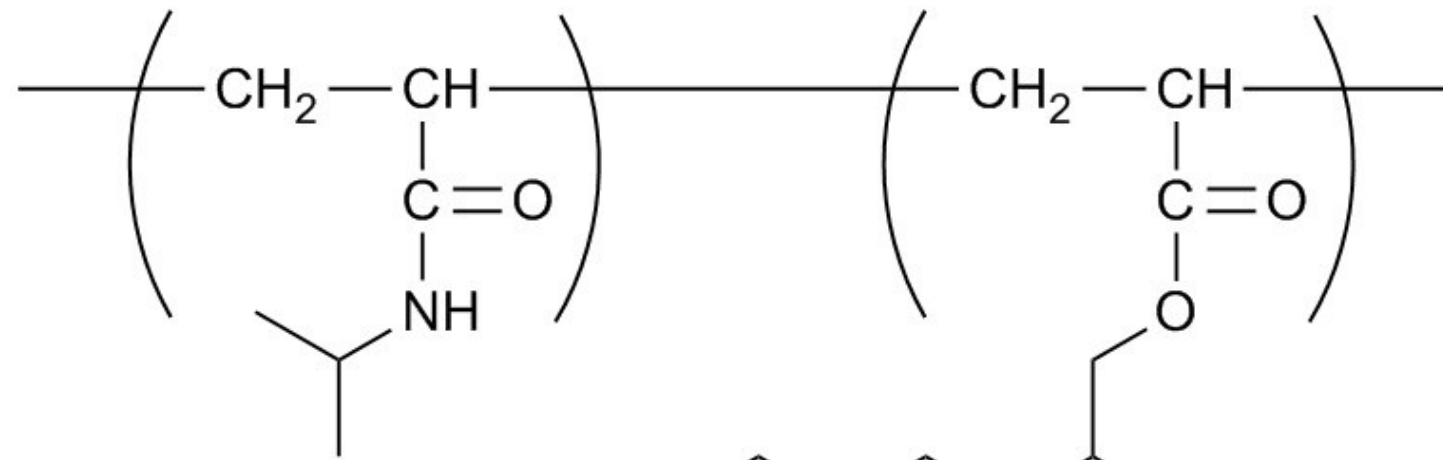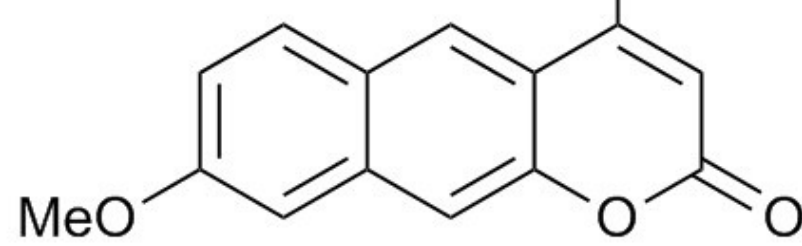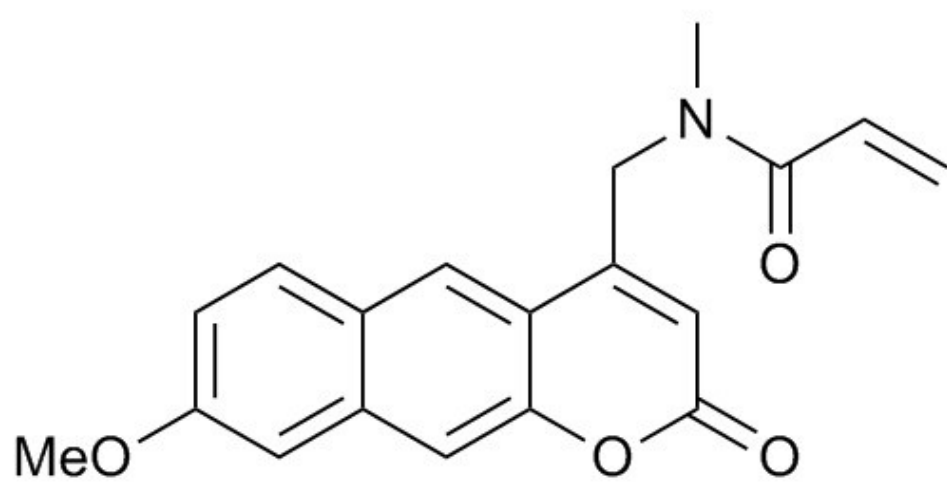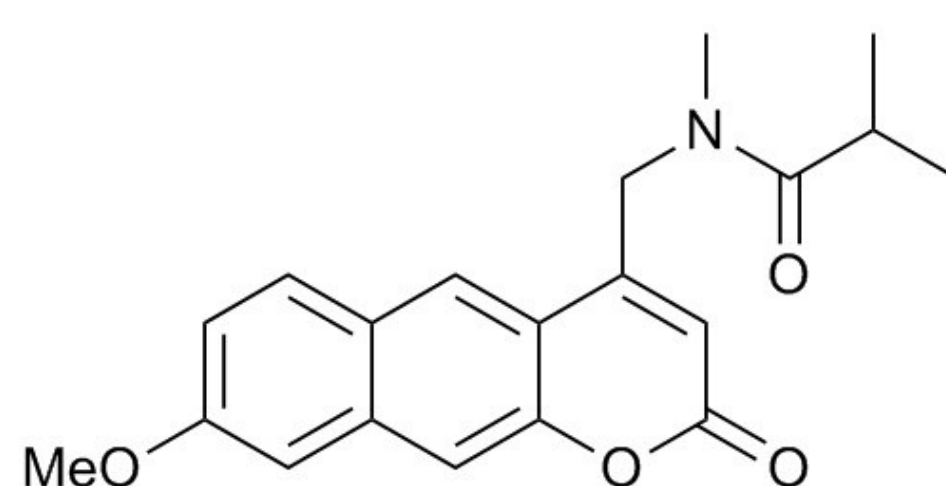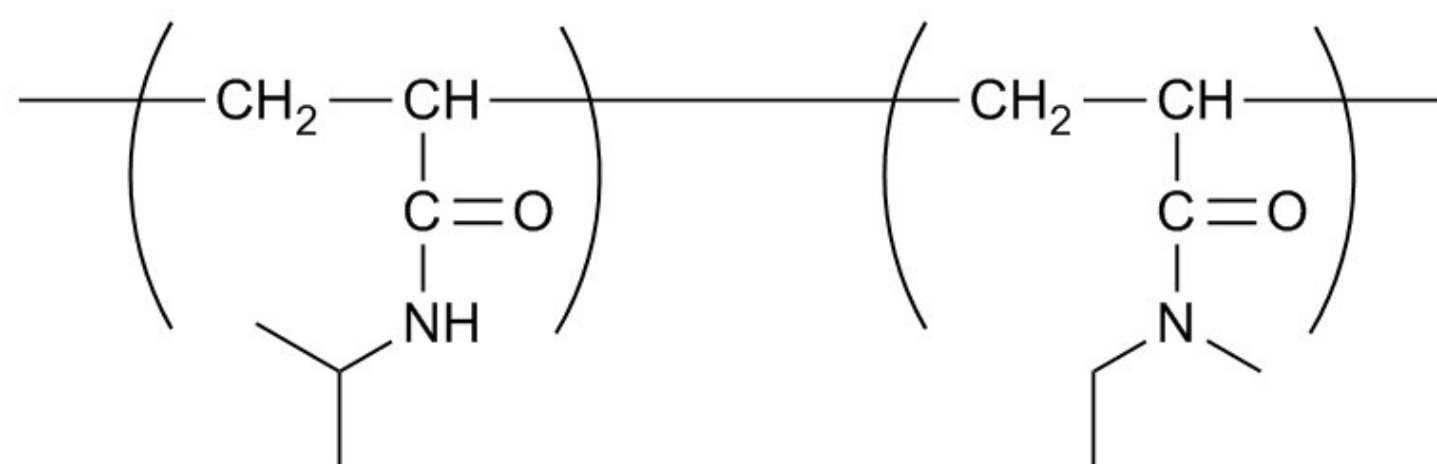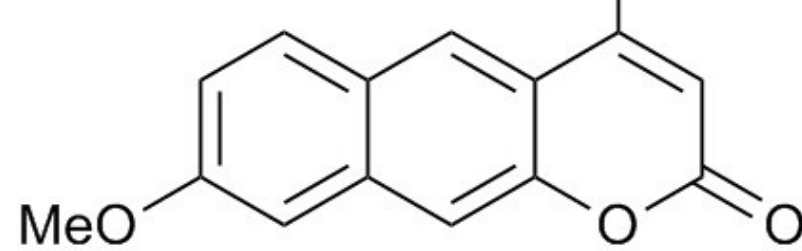

for Fig.1

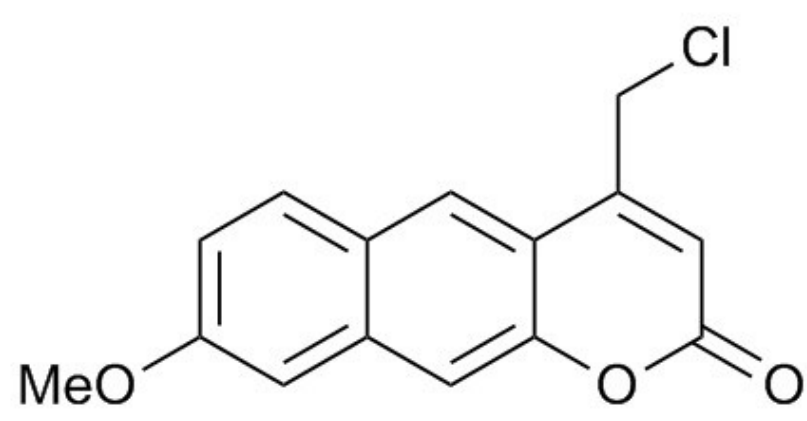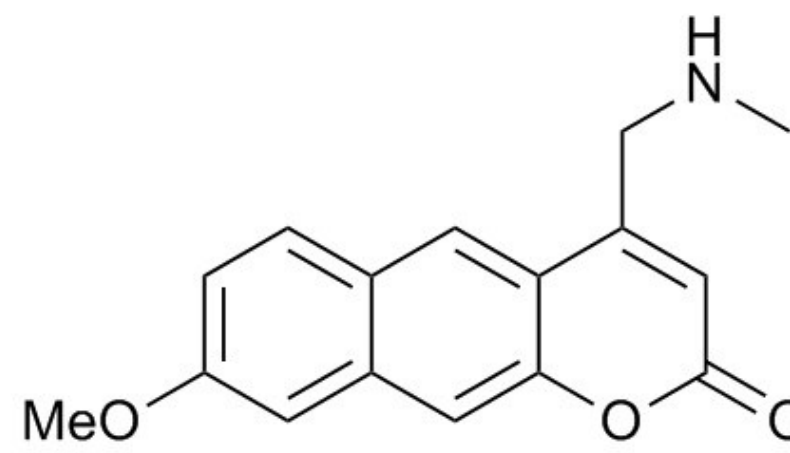

for Fig.2

Supplement: c6pp00150e1.pdf [file c6pp00150e1.pdf]
